# Supplementary material for: Discovering Conformational Sub-States Relevant to Protein Function
Source: PubMed Central journal article supplement (PMC3030567; doi:10.1371/journal.pone.0015827), 2011-01-28
Supplement: pone.0015827.s014.pdf [file pone.0015827.s014.pdf]

## Comparison of QAA with dihedral PCA

Dihedral-PCA (dPCA) uses the internal  $\phi - \psi$  angles of the protein backbone as the variables on which PCA is performed [69]. In particular the  $\phi - \psi$  angles are converted into a Euclidean representation where each  $\phi_i$  and  $\psi_i$  is converted into a 4-tuple:  $x_{i-3} = \cos(\phi_i)$ ;  $x_{i-2} = \sin(\phi_i)$ ;  $x_{i-1} = \cos(\psi_i)$ ;  $x_i = \sin(\psi_i)$ . For a  $N$  residue protein there are a total of  $2N$  backbone  $\phi$  and  $\psi$  angles. This representation produces a  $4P \times 4P$  covariance matrix where  $P(= 2N)$  is the total number of  $\phi$  and  $\psi$  angles in the protein. The covariance matrix is then diagonalized to produce the corresponding eigenvalues and eigenvectors. The approach is ideally suited in cases where an internal alignment of conformations generated by a simulation is difficult, as in protein folding/unfolding trajectories [69–71].

Our implementation of dPCA for ubiquitin (as shown in Figure S4) also leads to the presence of multiple clusters as observed in previous work on different proteins [69, 71]. However, when the conformations are projected and colored using the scaled internal energies, the clusters in dPCA lack homogeneity. Thus, the ability to find energetically coherent sub-states in QAA makes it unique for this reason.
